# Supplementary material for: Metal–organic framework bearing new viologen ligand for ammonia and Cr2O72− sensing
Source: Royal Society of Chemistry journal article supplement (doi:10.1039/d2ra00599a), 2022-01-01
Supplement: d2ra00599a1.pdf [file d2ra00599a1.pdf]

## Metal-Organic Framework Bearing New Violet Ligand for Ammonia and $\text{Cr}_2\text{O}_7^{2-}$ Sensing

Baili Zhu<sup>a</sup>, Yunpeng Jin<sup>a</sup>, Jingying Chu<sup>a</sup>, Minghui Zuo<sup>a</sup>, Shuxin Cui<sup>a,\*</sup>

<sup>a</sup>Heilongjiang Key Laboratory of Photoelectric Functional Materials, College of Chemistry and Chemical Engineering, Mudanjiang Normal University Mudanjiang 157011, People's Republic of China

### Synthesis of 4-BCBPY·2Cl.

4-BCBPY·2Cl: Dissolve 4,4'-bipyridine (10 mmol, 1.56 g) and 4-cyanobenzyl chloride (20 mmol, 3.92 g) in 25mL of N, N'-dimethylformamide (DMF), and stir at 110°C for 6h. Filtration yielded a yellow product. The obtained product was washed 3 times with hot DMF and recrystallized with methanol to finally obtain a yellow solid. The yield was 90%.

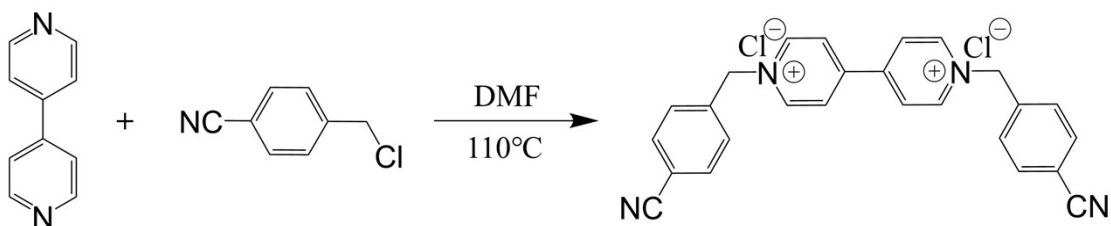

Scheme S1. The synthetic method of 4-BCBPY·2Cl.

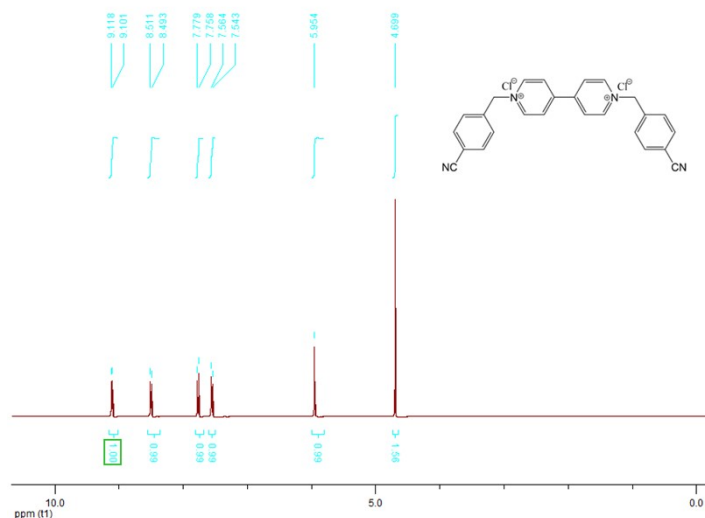

Figure S1. The <sup>1</sup>H NMR spectrum of 4-BCBPY·2Cl in D<sub>2</sub>O (600 MHz).

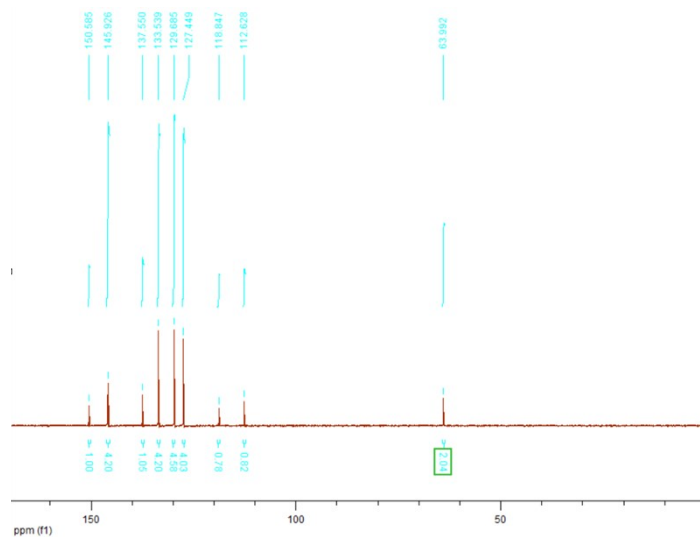

Figure S2. The  $^{13}\text{C}$  NMR spectrum of 4-BCBPY·2Cl in  $\text{D}_2\text{O}$  (600 MHz).

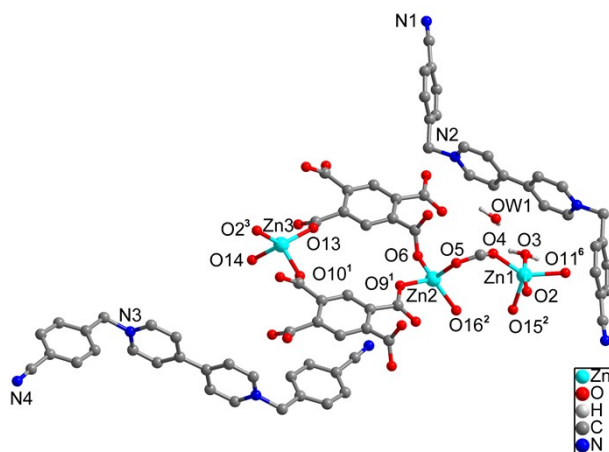

Figure S3. The selected structural unit of compound **1** (Symmetry codes:  $^1+x, 1+y, +z; ^2+x, 1-y, -1/2+z; ^3+x, 1-y, 1/2+z; ^4+x, -y, -1/2+z; ^5+x, -1+y, +z; ^6+x, -y, 1/2+z$ ).

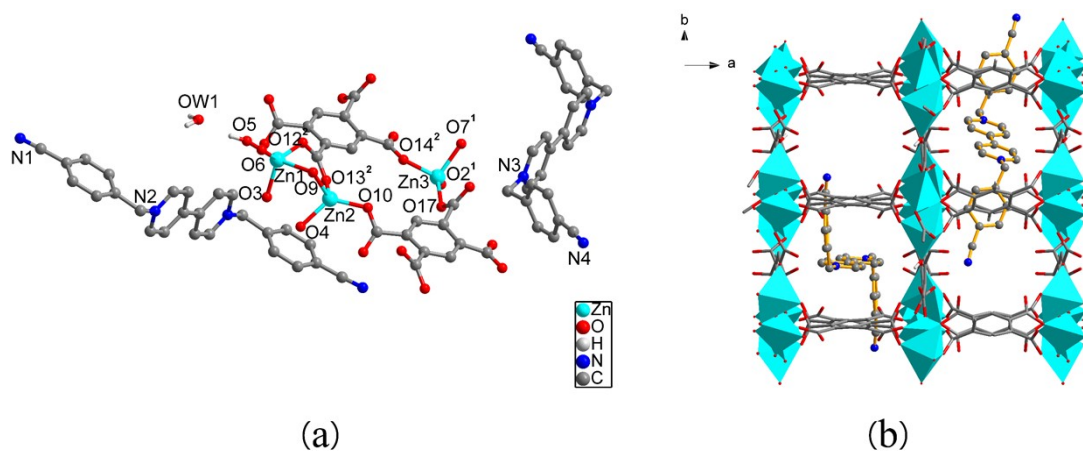

Figure S4. The selected structural unit (a) and 3D packing structure (b) of compound **2** (Symmetry codes:  $^1+x, 1-y, 1/2+z; ^2+x, -1+y, +z$ ).

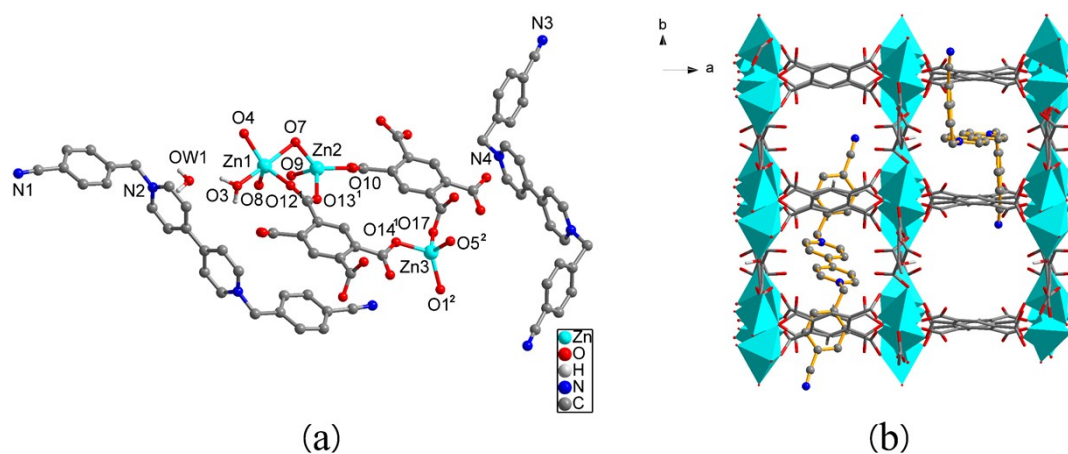

Figure S5. The selected structural unit (a) and 3D packing structure (b) of compound **3** (Symmetry codes:  $^1+x, -1+y, +z$ ;  $^2+x, 1-y, 1/2+z$ ).

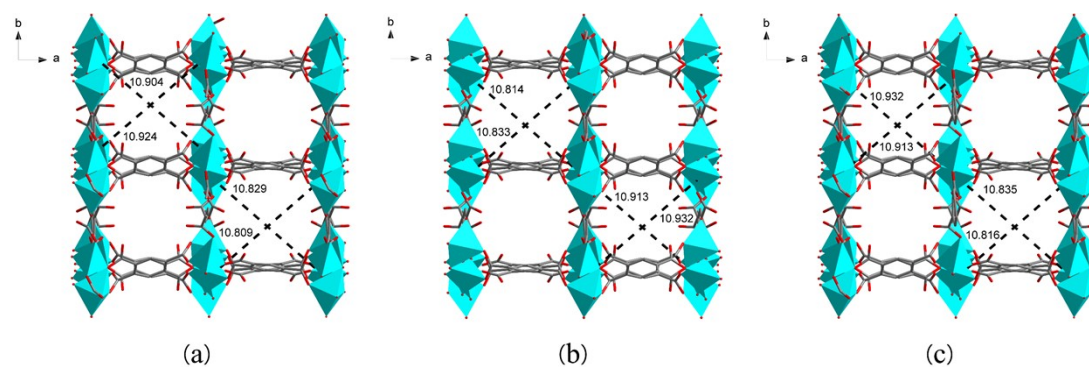

Figure S6. Estimated channel size for compounds **1(a)**, **2(b)** and **3(c)**.

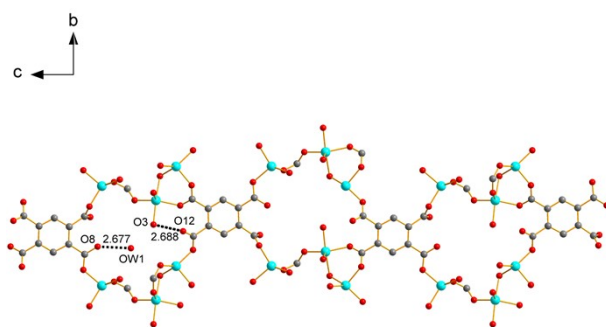

(a)

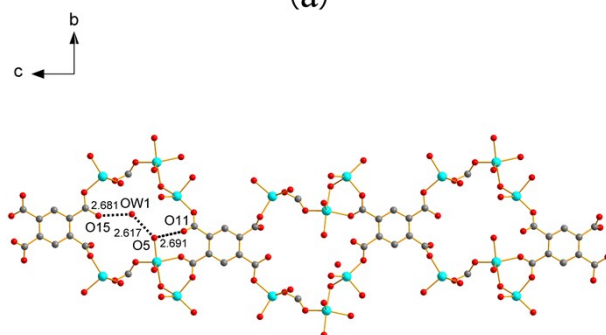

(b)

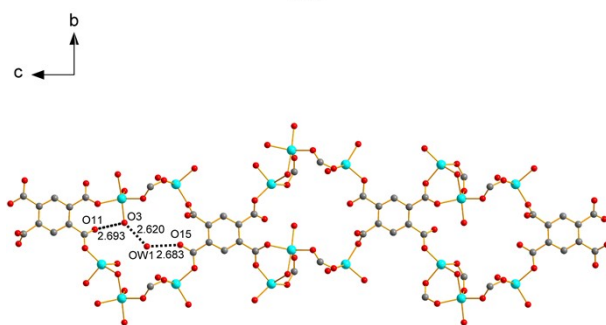

(c)

Figure S7. The hydrogen bonding interaction of compounds **1(a)**, **2(b)** and **3(c)**.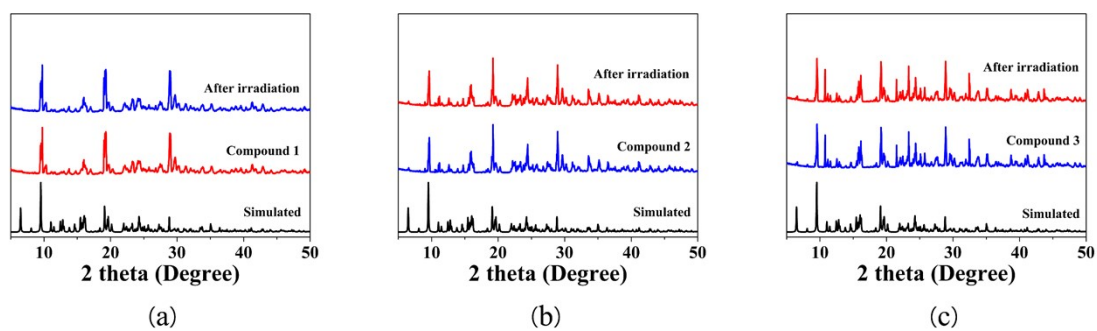Figure S8. PXRD patterns of compounds **1(a)**, **2(b)** and **3(c)**.

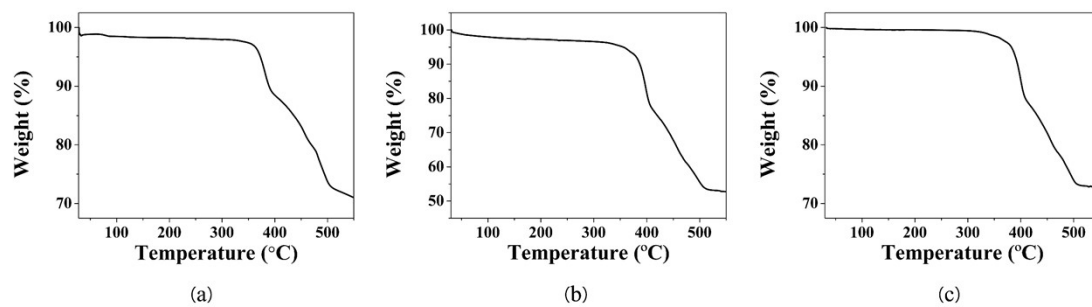

Figure S9. TGA curves of compounds **1**(a), **2**(b) and **3**(c).

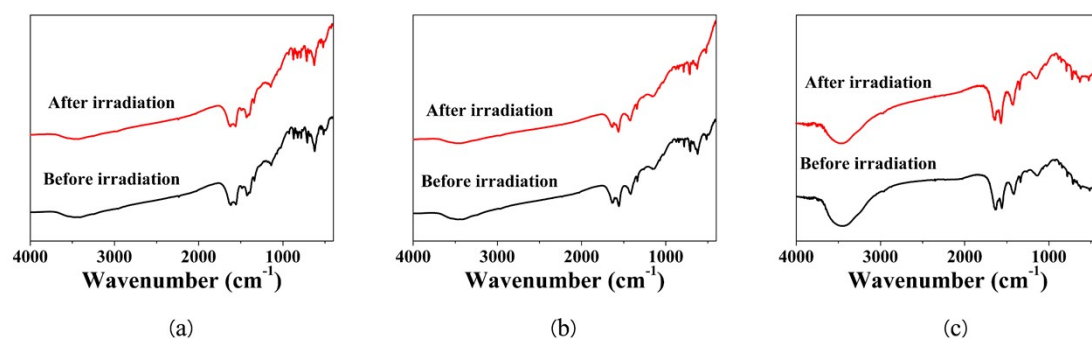

Figure S10. FT-IR spectra of compounds **1**(a), **2**(b) and **3**(c).

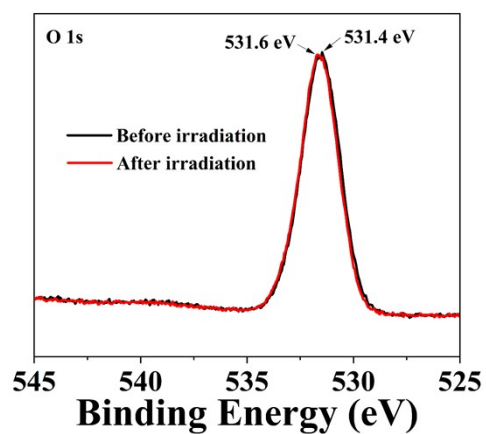

(a)

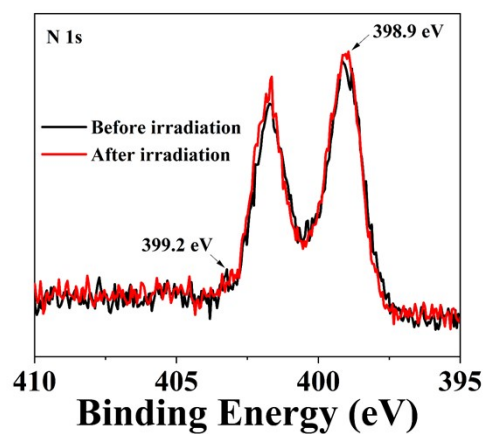

(b)

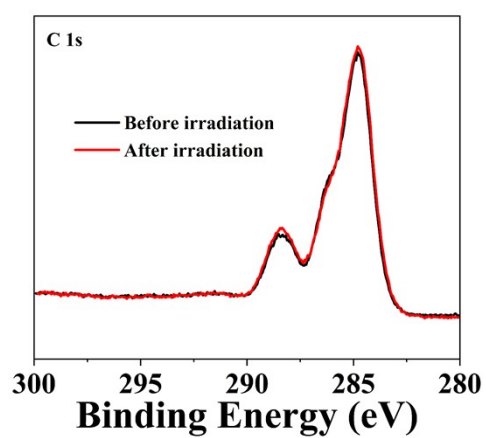

(c)

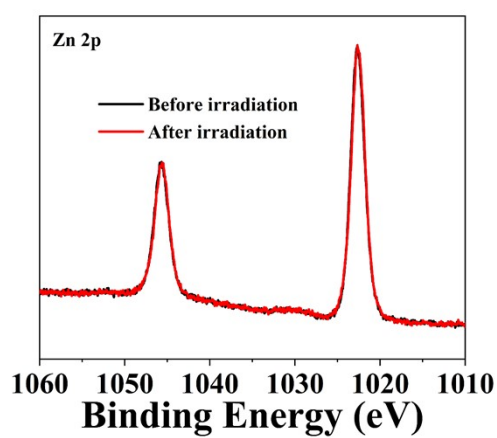

(d)

Figure S11. O 1s (a), N 1s (b), C 1s (c), Zn 2p (d) XPS for compound 1 before and after irradiation.

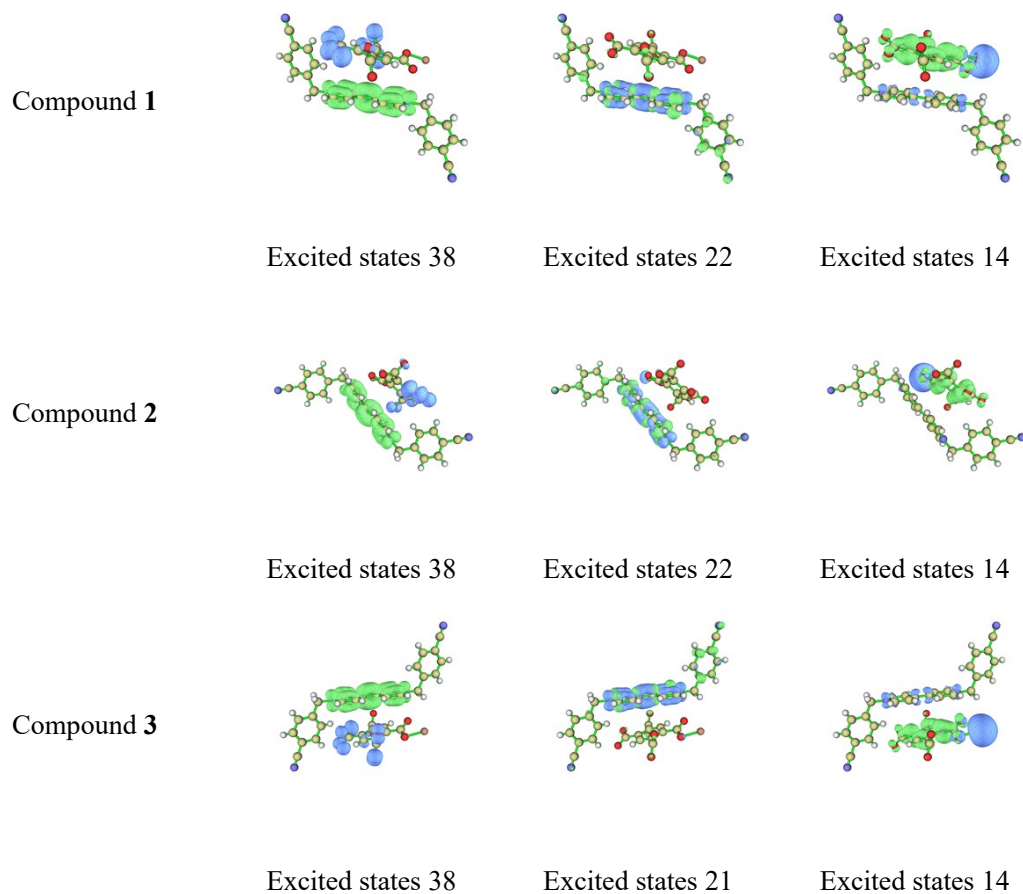

Figure S12. The charge density difference diagrams of compounds 1, 2 and 3.

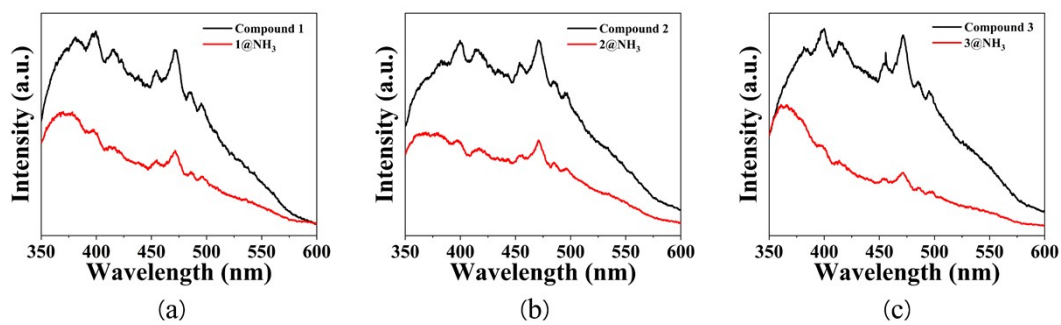

Figure S13. Compounds 1(a), 2(b) and 3(c) have different fluorescence quenching phenomena for ammonia.



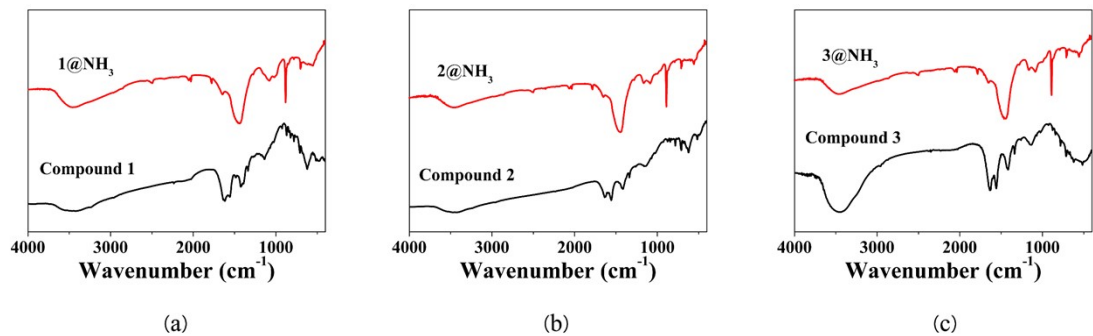

Figure S14. FT-IR spectra of **1@NH<sub>3</sub>**(a), **2@NH<sub>3</sub>**(b) and **3@NH<sub>3</sub>**(c).

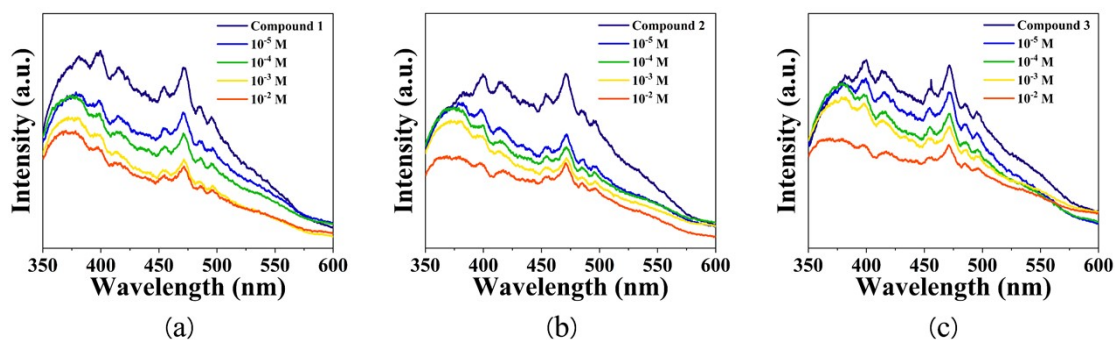

Figure S15. The fluorescence quenching of compounds **1**(a), **2**(b), and **3**(c) in the presence of different concentrations of  $\text{Cr}_2\text{O}_7^{2-}$ .

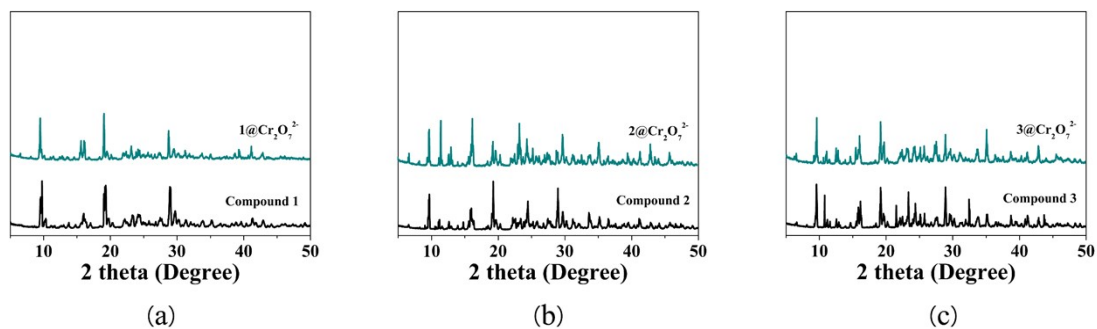

Figure S16. PXRD patterns of **1@Cr<sub>2</sub>O<sub>7</sub><sup>2-</sup>**(a), **2@Cr<sub>2</sub>O<sub>7</sub><sup>2-</sup>**(b) and **3@Cr<sub>2</sub>O<sub>7</sub><sup>2-</sup>**(c).



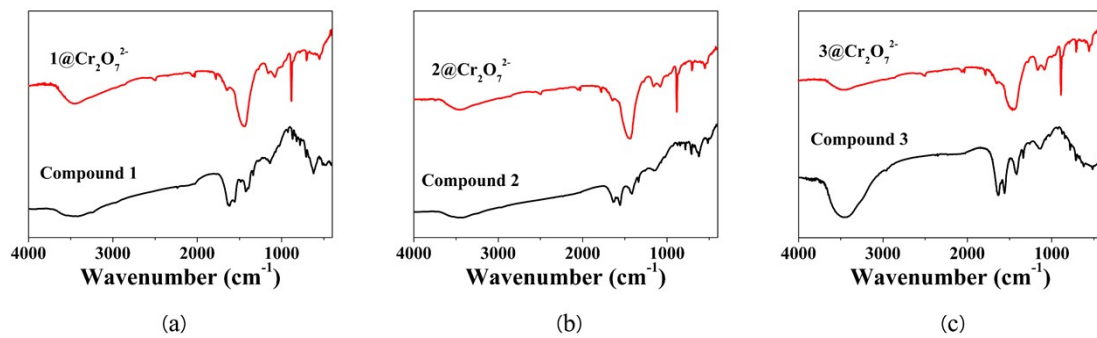

Figure S17. FT-IR spectra of  $1@Cr_2O_7^{2-}$ (a),  $2@Cr_2O_7^{2-}$ (b) and  $3@Cr_2O_7^{2-}$ (c).

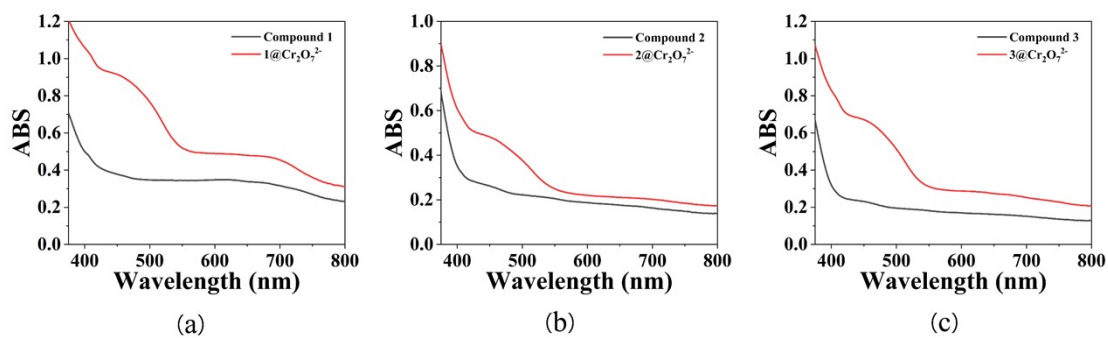

Figure S18. UV-Vis spectra of  $1@Cr_2O_7^{2-}$ (a),  $2@Cr_2O_7^{2-}$ (b) and  $3@Cr_2O_7^{2-}$ (c).

Table S1. Crystal data and structure refinement for **1**, **2** and **3**.

| <b>Compound</b>                       | <b>1</b>                                                                       | <b>2</b>                                                                       | <b>3</b>                                                                       |
|---------------------------------------|--------------------------------------------------------------------------------|--------------------------------------------------------------------------------|--------------------------------------------------------------------------------|
| Empirical formula                     | C <sub>46</sub> H <sub>28</sub> N <sub>4</sub> O <sub>18</sub> Zn <sub>3</sub> | C <sub>46</sub> H <sub>28</sub> N <sub>4</sub> O <sub>18</sub> Zn <sub>3</sub> | C <sub>46</sub> H <sub>28</sub> N <sub>4</sub> O <sub>18</sub> Zn <sub>3</sub> |
| Formula weight                        | 1120.89                                                                        | 1120.89                                                                        | 1120.89                                                                        |
| Temperature/K                         | 296.15                                                                         | 296.15                                                                         | 296.15                                                                         |
| Crystal system                        | monoclinic                                                                     | monoclinic                                                                     | monoclinic                                                                     |
| Space group                           | <i>P2/c</i>                                                                    | <i>P2/c</i>                                                                    | <i>P2/c</i>                                                                    |
| <i>a</i> /Å                           | 18.566(2)                                                                      | 18.5619(16)                                                                    | 18.5787(17)                                                                    |
| <i>b</i> /Å                           | 8.0029(9)                                                                      | 8.0153(7)                                                                      | 8.0072(8)                                                                      |
| <i>c</i> /Å                           | 27.231(3)                                                                      | 27.220(2)                                                                      | 27.240(2)                                                                      |
| <i>α</i> /°                           | 90                                                                             | 90                                                                             | 90                                                                             |
| <i>β</i> /°                           | 90.472(2)                                                                      | 90.5820(10)                                                                    | 90.531(2)                                                                      |
| <i>γ</i> /°                           | 90                                                                             | 90                                                                             | 90                                                                             |
| Volume/Å <sup>3</sup>                 | 4045.9(8)                                                                      | 4049.6(6)                                                                      | 4052.1(6)                                                                      |
| <i>Z</i>                              | 4                                                                              | 4                                                                              | 4                                                                              |
| $\rho_{\text{calc}}/\text{cm}^3$      | 1.840                                                                          | 1.839                                                                          | 1.837                                                                          |
| $\mu/\text{mm}^{-1}$                  | 1.858                                                                          | 1.856                                                                          | 1.855                                                                          |
| $2\theta$ range for data collection/° | 3.696 to 55.23                                                                 | 5.338 to 55.42                                                                 | 5.088 to 55.22                                                                 |
| Goodness-of-fit on $F^2$              | 1.091                                                                          | 1.013                                                                          | 1.006                                                                          |
| Final R indexes                       | $R_1 = 0.0693,$                                                                | $R_1 = 0.0355,$                                                                | $R_1 = 0.0486,$                                                                |
| $[I \geq 2\sigma(I)]$                 | $wR_2 = 0.1396$                                                                | $wR_2 = 0.0776$                                                                | $wR_2 = 0.0853$                                                                |
| Final R indexes                       | $R_1 = 0.1187,$                                                                | $R_1 = 0.0535,$                                                                | $R_1 = 0.1029,$                                                                |
| [all data]                            | $wR_2 = 0.1551$                                                                | $wR_2 = 0.0838$                                                                | $wR_2 = 0.1016$                                                                |

Table S2. Selected bond Lengths (Å) and bond angles (°) for **1**.

| Atom                                       | Length/Å | Angle/°    |
|--------------------------------------------|----------|------------|
| Zn2-O5                                     | 1.999(5) |            |
| Zn2-O6                                     | 1.943(4) |            |
| Zn2-O9 <sup>1</sup>                        | 1.980(4) |            |
| Zn2-O16 <sup>2</sup>                       | 1.982(5) |            |
| Zn3-O13                                    | 1.909(5) |            |
| Zn3-O14                                    | 1.971(5) |            |
| Zn3-O10 <sup>1</sup>                       | 1.985(5) |            |
| Zn3-O2 <sup>3</sup>                        | 2.011(5) |            |
| Zn1-O11 <sup>4</sup>                       | 2.023(4) |            |
| Zn1-O15 <sup>2</sup>                       | 1.988(5) |            |
| Zn1-O4                                     | 1.985(4) |            |
| Zn1-O2                                     | 2.143(5) |            |
| Zn1-O3                                     | 2.013(5) |            |
| O6-Zn2-O5                                  |          | 120.5(2)   |
| O6-Zn2-O9 <sup>1</sup>                     |          | 100.28(19) |
| O6-Zn2-O16 <sup>2</sup>                    |          | 120.4(2)   |
| O9 <sup>1</sup> -Zn2-O5                    |          | 97.5(2)    |
| O9 <sup>1</sup> -Zn2-O16 <sup>2</sup>      |          | 118.5(2)   |
| O16 <sup>2</sup> -Zn2-O5                   |          | 98.4(2)    |
| O13-Zn3-O14                                |          | 124.2(2)   |
| O13-Zn3-O10 <sup>1</sup>                   |          | 96.1(2)    |
| O13-Zn3-O2 <sup>3</sup>                    |          | 127.4(2)   |
| O14-Zn3-O10 <sup>1</sup>                   |          | 106.6(2)   |
| O14-Zn3-O2 <sup>3</sup>                    |          | 96.2(2)    |
| O10 <sup>1</sup> -Zn3-O2 <sup>3</sup>      |          | 103.3(2)   |
| O11 <sup>4</sup> -Zn1-O2                   |          | 88.38(19)  |
| O15 <sup>2</sup> -Zn1-<br>O11 <sup>4</sup> |          | 109.1(2)   |
| O15 <sup>2</sup> -Zn1-O2                   |          | 96.2(2)    |
| O15 <sup>2</sup> -Zn1-O3                   |          | 93.8(2)    |
| O4-Zn1-O11 <sup>4</sup>                    |          | 138.0(2)   |
| O4-Zn1-O15 <sup>2</sup>                    |          | 112.9(2)   |
| O4-Zn1-O2                                  |          | 86.10(19)  |
| O4-Zn1-O3                                  |          | 91.9(2)    |
| O3-Zn1-O11 <sup>4</sup>                    |          | 86.4(2)    |
| O3-Zn1-O2                                  |          | 169.8(2)   |

Symmetry codes: <sup>1</sup>+x, 1+y, +z; <sup>2</sup>+x, 1-y, -1/2+z; <sup>3</sup>+x, 1-y, 1/2+z; <sup>4</sup>+x, -y, -1/2+z.

Table S3. Selected bond Lengths (Å) and bond angles (°) for 2.

| Atom                                  | Length/Å   | Angle/°    |
|---------------------------------------|------------|------------|
| Zn3-O2 <sup>1</sup>                   | 1.9831(17) |            |
| Zn3-O7 <sup>1</sup>                   | 2.0019(18) |            |
| Zn3-O14 <sup>2</sup>                  | 1.9825(17) |            |
| Zn3-O17                               | 1.9472(17) |            |
| Zn2-O9                                | 2.0047(17) |            |
| Zn2-O4                                | 1.9728(18) |            |
| Zn2-O10                               | 1.9047(18) |            |
| Zn2-O13 <sup>2</sup>                  | 1.9884(18) |            |
| Zn1-O9                                | 2.1424(18) |            |
| Zn1-O12 <sup>2</sup>                  | 2.0231(17) |            |
| Zn1-O6                                | 1.9767(16) |            |
| Zn1-O3                                | 1.9931(18) |            |
| Zn1-O5                                | 2.016(2)   |            |
| O2 <sup>1</sup> -Zn3-O7 <sup>1</sup>  |            | 98.23(7)   |
| O14 <sup>2</sup> -Zn3-O2 <sup>1</sup> |            | 118.27(8)  |
| O14 <sup>2</sup> -Zn3-O7 <sup>1</sup> |            | 96.96(8)   |
| O17-Zn3-O2 <sup>1</sup>               |            | 120.65(7)  |
| O17-Zn3-O7 <sup>1</sup>               |            | 120.84(8)  |
| O17-Zn3-O14 <sup>2</sup>              |            | 100.53(8)  |
| O4-Zn2-O9                             |            | 96.43(8)   |
| O4-Zn2-O13 <sup>2</sup>               |            | 106.24(8)  |
| O10-Zn2-O9                            |            | 127.62(8)  |
| O10-Zn2-O4                            |            | 123.85(8)  |
| O10-Zn2-O13 <sup>2</sup>              |            | 96.13(8)   |
| O13 <sup>2</sup> -Zn2-O9              |            | 103.54(7)  |
| O12 <sup>2</sup> -Zn1-O9              |            | 88.67(7)   |
| O6-Zn1-O9                             |            | 86.12(7)   |
| O6-Zn1-O12 <sup>2</sup>               |            | 137.97(7)  |
| O6-Zn1-O3                             |            | 112.70(8)  |
| O6-Zn1-O5                             |            | 91.85(8)   |
| O3-Zn1-O9                             |            | 95.84(7)   |
| O3-Zn1-O12 <sup>2</sup>               |            | 109.32(7)  |
| O3-Zn1-O5                             |            | 94.05(10)  |
| O5-Zn1-O9                             |            | 169.92(10) |
| O5-Zn1-O12 <sup>2</sup>               |            | 86.24(8)   |

Symmetry codes: <sup>1</sup>+x, 1-y, 1/2+z; <sup>2</sup>+x, -1+y, +z.

Table S4. Selected bond Lengths (Å) and bond angles (°) for **3**.

| Atom                                  | Length/Å | Angle/°    |
|---------------------------------------|----------|------------|
| Zn3-O5 <sup>1</sup>                   | 2.001(3) |            |
| Zn3-O14 <sup>2</sup>                  | 1.983(3) |            |
| Zn3-O17                               | 1.943(3) |            |
| Zn3-O11                               | 1.981(3) |            |
| Zn2-O10                               | 1.902(3) |            |
| Zn2-O9                                | 1.974(3) |            |
| Zn2-O7                                | 2.007(3) |            |
| Zn2-O13 <sup>2</sup>                  | 1.989(3) |            |
| Zn1-O12 <sup>2</sup>                  | 2.021(2) |            |
| Zn1-O7                                | 2.138(3) |            |
| Zn1-O4                                | 1.979(2) |            |
| Zn1-O8                                | 1.992(3) |            |
| Zn1-O3                                | 2.008(3) |            |
| O14 <sup>1</sup> -Zn3-O5 <sup>2</sup> |          | 96.95(11)  |
| O17-Zn3-O5 <sup>2</sup>               |          | 120.61(11) |
| O17-Zn3-O14 <sup>1</sup>              |          | 100.59(11) |
| O17-Zn3-O1 <sup>2</sup>               |          | 120.55(11) |
| O12-Zn3-O5 <sup>2</sup>               |          | 98.41(11)  |
| O12-Zn3-O14 <sup>1</sup>              |          | 118.36(12) |
| O10-Zn2-O9                            |          | 123.65(12) |
| O10-Zn2-O7                            |          | 127.77(12) |
| O10-Zn2-O13 <sup>1</sup>              |          | 96.12(12)  |
| O9-Zn2-O7                             |          | 96.36(11)  |
| O9-Zn2-O13 <sup>1</sup>               |          | 106.38(12) |
| O13 <sup>1</sup> -Zn2-O7              |          | 103.62(11) |
| O12 <sup>1</sup> -Zn1-O7              |          | 88.66(11)  |
| O4-Zn1-O12 <sup>1</sup>               |          | 137.94(11) |
| O4-Zn1-O7                             |          | 86.13(11)  |
| O4-Zn1-O8                             |          | 112.67(11) |
| O4-Zn1-O3                             |          | 91.81(12)  |
| O8-Zn1-O12 <sup>1</sup>               |          | 109.38(10) |
| O8-Zn1-O7                             |          | 95.87(11)  |
| O8-Zn1-O3                             |          | 93.98(14)  |
| O3-Zn1-O12 <sup>1</sup>               |          | 86.30(12)  |
| O3-Zn1-O7                             |          | 169.98(14) |

Symmetry codes: <sup>1</sup>+x, 1-y, 1/2+z; <sup>2</sup>+x, -1+y, +z.

Table S5. O–H···O interactions Geometry (Å, °) for **1**, **2** and **3**.

|                   | D-H...A                     | d(D-H) | d(H...A) | d(D...A) | <(DHA) |
|-------------------|-----------------------------|--------|----------|----------|--------|
| <b>Compound 1</b> | O3-H3B...O12 <sup>1</sup>   | 0.90   | 1.88     | 2.688(7) | 149.1  |
|                   | OW1-HW1B...O8               | 0.85   | 2.00     | 2.676(7) | 135.5  |
| <b>Compound 2</b> | O5-H5A...OW1                | 0.85   | 1.78     | 2.616(3) | 167.3  |
|                   | O5-H5B...O11 <sup>1</sup>   | 0.85   | 1.93     | 2.691(3) | 147.7  |
|                   | OW1-HW1A...O15 <sup>2</sup> | 0.85   | 1.83     | 2.681(3) | 174.2  |
| <b>Compound 3</b> | O3-H3A...OW1                | 0.85   | 1.79     | 2.620(4) | 163.9  |
|                   | O3-H3B...O11 <sup>1</sup>   | 0.85   | 1.95     | 2.694(4) | 146.1  |
|                   | OW1-HW1B...O15 <sup>2</sup> | 0.85   | 1.85     | 2.683(4) | 165.5  |

Symmetry code of **1**:  $^1+x, -y, -1/2+z$ .

Symmetry codes of **2**:  $^1+x, -1+y, +z; ^2+x, 1-y, -1/2+z$ .

Symmetry codes of **3**:  $^1+x, -1+y, +z; ^2+x, 1-y, -1/2+z$ .

Table S6. The main crystal data of **1**, **1P**, **2**, **2P**, **3** and **3P**.

| Compound              | <b>1</b>    | <b>1P</b>   | <b>2</b>    | <b>2P</b>   | <b>3</b>    | <b>3P</b>   |
|-----------------------|-------------|-------------|-------------|-------------|-------------|-------------|
| Space group           | <i>P2/c</i> | <i>P2/c</i> | <i>P2/c</i> | <i>P2/c</i> | <i>P2/c</i> | <i>P2/c</i> |
| <i>a</i> /Å           | 18.566      | 18.5771     | 18.5619     | 18.577      | 18.5787     | 18.6073     |
|                       | (2)         | (17)        | (16)        | (2)         | (17)        | (15)        |
| <i>b</i> /Å           | 8.0029      | 8.0007      | 8.0153      | 8.0124      | 8.0072      | 8.0235      |
|                       | (9)         | (7)         | (7)         | (10)        | (8)         | (7)         |
| <i>c</i> /Å           | 27.231      | 27.235      | 27.220      | 27.266      | 27.240      | 27.301      |
|                       | (3)         | (3)         | (2)         | (4)         | (2)         | (2)         |
| $\alpha$ /°           | 90          | 90          | 90          | 90          | 90          | 90          |
| $\beta$ /°            | 90.472      | 90.504      | 90.5820     | 90.554      | 90.531      | 90.501      |
|                       | (2)         | (2)         | (10)        | (2)         | (2)         | (2)         |
| $\gamma$ /°           | 90          | 90          | 90          | 90          | 90          | 90          |
| Volume/Å <sup>3</sup> | 4045.9      | 4047.8      | 4049.6      | 4058.3      | 4052.1      | 4075.8      |
|                       | (8)         | (7)         | (6)         | (9)         | (6)         | (6)         |

Table S7. Results of the TDDFT/B3LYP-lanl2dz calculations related to **1**, **2** and **3**.

|                   | Excited states | $\lambda_{\max}$ / nm |       | f      |
|-------------------|----------------|-----------------------|-------|--------|
|                   |                | Exp.                  | Calc. |        |
| Compound <b>1</b> | 38             | 404                   | 401   | 0.0004 |
|                   | 22             | 615                   | 574   | 0.2405 |
|                   | 14             | 740                   | 710   | 0.0027 |
| Compound <b>2</b> | 38             | 404                   | 395   | 0.0003 |
|                   | 22             | 615                   | 585   | 0.2973 |
|                   | 14             | 734                   | 704   | 0.0055 |
| Compound <b>3</b> | 38             | 405                   | 391   | 0.0002 |
|                   | 21             | 615                   | 599   | 0.3604 |
|                   | 14             | 739                   | 720   | 0.0038 |

Table S8. Comparison of Response Time of Ammonia Sensors.

| Materials                                                                                                         | Response time | Ref       |
|-------------------------------------------------------------------------------------------------------------------|---------------|-----------|
| $\{\text{[Eu}_3(\text{Bcbp})_3(\text{NO}_3)_7] \cdot \text{NO}_3 \cdot \text{ClO}_4\}_n$                          | 1 min         | 11        |
| $[\text{Cd}_2(\text{Pbpy})(\text{bdc})_2\text{I}_2] \cdot 4\text{H}_2\text{O}$                                    | 5 s           | 25        |
| $[\text{Cd}_2(\text{Pbpy})(\text{Bdc})_2\text{Cl}_2] \cdot n\text{H}_2\text{O}$                                   | 30 s          | 37        |
| $[\text{Cd}_2\text{Cl}(\text{m-bpybdc})_2(\text{H}_2\text{O})_4] \cdot (\text{NO}_3)_3 \cdot 7\text{H}_2\text{O}$ | -             | 38        |
| $\{\text{[Zn}_3(\text{BTEC})_2(\text{H}_2\text{O})(4\text{-BCBPY})] \cdot \text{H}_2\text{O}\}_n$ (1-3)           | 3s/6s/15s     | This work |

Table S9. Comparison of  $\text{Cr}_2\text{O}_7^{2-}$  Fluorescence Sensors.

| Fluorescent Materials                                                                                         | $K_{SV}$ ( $\text{M}^{-1}$ )               | DL ( $\mu\text{M}$ ) | Ref       |
|---------------------------------------------------------------------------------------------------------------|--------------------------------------------|----------------------|-----------|
| $\{\text{[Eu}_3(\text{Bcbp})_3(\text{NO}_3)_7] \cdot \text{NO}_3 \cdot \text{ClO}_4\}_n$                      | $1.40 \times 10^4$                         | 5.6                  | 11        |
| $\{\text{[Eu}(\text{BCEbpy})(\text{H}_2\text{O})_4](\text{CoIII}(\text{CN})_6) \cdot 4\text{H}_2\text{O}\}_n$ | $4.31 \times 10^3$                         | 9.6                  | 33        |
| $[\text{Eu}(\text{ipbp})_2(\text{H}_2\text{O})_3] \cdot \text{Br} \cdot 6\text{H}_2\text{O}$                  | $8.98 \times 10^3$                         | 5.16                 | 39        |
| $[\text{Zn}(\text{TTVTC})] \cdot 4\text{H}_2\text{O}$                                                         | $1.38 \times 10^4$                         | 0.41                 | 40        |
| $\{\text{[Zn}_3(\text{BTEC})_2(\text{H}_2\text{O})(4\text{-BCBPY})] \cdot \text{H}_2\text{O}\}_n$ (1-3)       | $9.12 \times 10^3$ ,                       | 3.28                 | This work |
|                                                                                                               | $1.56 \times 10^4$ ,<br>$8.60 \times 10^3$ | 7.69<br>10.40        |           |
